# Supplementary material for: The Non-Recurrent Laryngeal Nerve: a meta-analysis and clinical considerations
Source: PubMed Central journal article supplement (PMC5363258; doi:10.7717/peerj.3012), 2017-03-21
Supplement: peerj-05-3012-s003.pdf [file peerj-05-3012-s003.pdf]

| <b>Study ID</b> | <b>Region</b> | <b>Country</b> | <b>Type of Study</b> | <b>n= Right RLNs examined</b> | <b># of NRLN R</b> |
|-----------------|---------------|----------------|----------------------|-------------------------------|--------------------|
| Ardito 2004     | Europe        | Italy          | Intraoperative       | 1342                          | 5                  |
| Asgharpour 2012 | Europe        | England        | Cadaveric            | 143                           | 1                  |
| Barczynski 2015 | Europe        | Poland         | Intraoperative       | 1250                          | 9                  |
| Beneragama 2006 | Oceania       | Australia      | Intraoperative       | 114                           | 1                  |
| Benouaich 2012  | Europe        | France         | Cadaveric            | 10                            | 0                  |
| Bula 2015       | Europe        | Poland         | Intraoperative       | 1710                          | 4                  |
| Cai 2013        | Asia          | China          | Intraoperative       | 783                           | 4                  |
| Campos 2000     | South America | Brazil         | Cadaveric            | 71                            | 0                  |
| Chiang 2012     | Asia          | Taiwan         | Intraoperative       | 310                           | 4                  |
| Dolezel 2015    | Europe        | Czech Republic | Intraoperative       | 725                           | 4                  |
| Donatini 2013   | Europe        | Italy          | Intraoperative       | 402                           | 11                 |
| Flament 1983    | Europe        | France         | Cadaveric            | 100                           | 2                  |
| Freschi 1994    | Europe        | Italy          | Intraoperative       | 42                            | 0                  |
| Han 2015        | Asia          | China          | Intraoperative       | 1056                          | 6                  |
| Henry 1988      | Europe        | France         | Intraoperative       | 4921                          | 31                 |
| Hermans 2003    | Europe        | Belgium        | Intraoperative       | 484                           | 1                  |
| Hong 2014       | Asia          | Korea          | Intraoperative       | 2187                          | 15                 |
| Hunt 1968       | Oceania       | Australia      | Cadaveric            | 77                            | 1                  |
| Iacobone 2015   | Europe        | Italy          | Intraoperative       | 1477                          | 17                 |
| Kaisha 2011     | Africa        | Kenya          | Cadaveric            | 73                            | 1                  |
| Kandil 2011     | North America | USA            | Intraoperative       | 162                           | 0                  |
| Lee 2009        | Asia          | Korea          | Cadaveric            | 70                            | 0                  |
| Lekacos 1992    | Europe        | Greece         | Intraoperative       | 109                           | 1                  |
| Makay 2008      | Europe        | Turkey         | Intraoperative       | 250                           | 0                  |
| Maranillo 2008  | Europe        | England        | Cadaveric            | 137                           | 1                  |
| Menck 1990      | Europe        | Germany        | Cadaveric            | 101                           | 0                  |
| Monfared 2002   | North America | USA            | Cadaveric            | 21                            | 1                  |
| Moreau 1998     | Europe        | France         | Cadaveric            | 17                            | 0                  |
| Ngo Nyeki 2015  | Africa        | Cameroon       | Intraoperative       | 32                            | 0                  |

|                  |               |             |                |      |    |
|------------------|---------------|-------------|----------------|------|----|
| Page 2003        | Europe        | France      | Intraoperative | 205  | 0  |
| Papadatos 1978   | Europe        | Switzerland | Cadaveric      | 239  | 2  |
| Pradeep 2012     | Asia          | India       | Intraoperative | 324  | 1  |
| Proye 1982       | Europe        | France      | Intraoperative | 2490 | 15 |
| Raffaelli 2000   | Europe        | France      | Intraoperative | 656  | 3  |
| Reed 1943        | North America | USA         | Cadaveric      | 253  | 3  |
| Sasou 1998       | Asia          | Japan       | Intraoperative | 367  | 0  |
| Satoh 2013       | Asia          | Japan       | Intraoperative | 1561 | 11 |
| Sciumè 2005      | Europe        | Italy       | Intraoperative | 263  | 2  |
| Serpell 2009     | Oceania       | Australia   | Intraoperative | 432  | 1  |
| Shao 2010        | Asia          | China       | Intraoperative | 1988 | 12 |
| Shindo 2005      | North America | USA         | Intraoperative | 149  | 1  |
| Silva 2013       | South America | Brazil      | Cadaveric      | 106  | 1  |
| Skandalakis 1976 | North America | USA         | Cadaveric      | 102  | 1  |
| Sparta 2004      | Europe        | France      | Intraoperative | 274  | 2  |
| Stewart 1972     | North America | USA         | Intraoperative | 1776 | 6  |
| Sturniolo 1999   | Europe        | Italy       | Intraoperative | 141  | 0  |
| Sunanda 2010     | Asia          | Sri Lanka   | Intraoperative | 24   | 1  |
| Tang 2012        | Asia          | China       | Cadaveric      | 80   | 2  |
| Wade 1955        | Europe        | England     | Cadaveric      | 100  | 4  |
| Wang 2011        | Asia          | China       | Intraoperative | 290  | 9  |
| Watanabe 2001    | Asia          | Japan       | Imaging (CT)   | 594  | 6  |
| Watanabe 2016    | Asia          | Japan       | Intraoperative | 730  | 4  |
| Yang 2014        | Asia          | China       | Intraoperative | 2251 | 28 |

| Study ID        | # of NRLN R | NRLN with arteria lusoria |
|-----------------|-------------|---------------------------|
| Asgharpour 2012 | 1           | 1                         |
| Bula 2015       | 4           | 0                         |
| Cai 2013        | 4           | 4                         |
| Chiang 2012     | 4           | 4                         |
| Dolezel 2015    | 4           | 4                         |
| Flament 1983    | 2           | 2                         |
| Henry 1988      | 31          | 31                        |
| Hermans 2003    | 1           | 0                         |
| Hong 2014       | 15          | 14                        |
| Hunt 1968       | 1           | 1                         |
| Maranillo 2008  | 1           | 1                         |
| Monfared 2002   | 1           | 1                         |
| Papadatos 1978  | 2           | 2                         |
| Raffaelli 2000  | 3           | 3                         |
| Reed 1943       | 3           | 3                         |
| Satoh 2013      | 11          | 10                        |
| Skandalakis 197 | 1           | 1                         |
| Wang 2011       | 9           | 6                         |
| Watanabe 2001   | 6           | 6                         |
| Watanabe 2016   | 4           | 4                         |
| Yang 2014       | 28          | 28                        |

| Study ID        | # of NRLN R | Type A (origin at or above LTJ) | Type B (origin below LTJ) |
|-----------------|-------------|---------------------------------|---------------------------|
| Asgharpour 2012 | 1           | 1                               | 0                         |
| Bula 2015       | 4           | 4                               | 0                         |
| Cai 2013        | 4           | 1                               | 3                         |
| Chiang 2012     | 4           | 1                               | 3                         |
| Dolezel 2015    | 4           | 0                               | 4                         |
| Henry 1988      | 33          | 7                               | 26                        |
| Hong 2014       | 15          | 12                              | 3                         |
| Kaisha 2011     | 1           | 1                               | 0                         |
| Maranillo 2008  | 1           | 0                               | 1                         |
| Monfared 2002   | 1           | 1                               | 0                         |
| Papadatos 1978  | 2           | 1                               | 1                         |
| Reed 1943       | 3           | 3                               | 0                         |
| Stewart 1972    | 6           | 4                               | 2                         |
| Tang 2012       | 2           | 2                               | 0                         |
